# Supplementary material
Source: MDPI journal article supplement (https://www.mdpi.com/2072-4292/14/13/3031)
Supplement: s1 [file s1]

```

1  setwd("E:/S2Slope_grassland")
2  wuyispec <- read.table("E:/S2Slope_grassland/asd08GNP.txt", header=T, sep="\t", quote="")
3  names(wuyispec)
4  results<-
5  data.frame(site="site",R_seg="R_seg",NIR_seg="NIR_seg",G_Rslope="G_Rslope",rededge_slope="rededge_slope",NIR_slope="NIR_slope",NDVIhyper="NDVIhyper",Rmin="Rmin",NDVlt="NDVlt")
6  print(ncol(wuyispec))
7  wavelength <- wuyispec[,1]
8  for (i in 2:ncol(wuyispec)){
9      site <- wuyispec[,i]
10     col_data <- cbind(wavelength,site)
11     col_data <- as.data.frame(col_data)
12     asd.seg<-segmented(glm(site~wavelength,data = col_data), seg.z=~wavelength,
13     psi=c(0.67,0.76))
14     data_1<-subset(col_data,wavelength<asd.seg$psi[3])
15     data_2<-subset(col_data,wavelength>asd.seg$psi[3]& wavelength<asd.seg$psi[4])
16     data_3<-subset(col_data,wavelength>asd.seg$psi[4])
17     mod1<-lm(site~wavelength,data=data_1)
18     mod2<-lm(site~wavelength,data=data_2)
19     mod3<-lm(site~wavelength,data=data_3)
20     R1 = subset(col_data,wavelength==0.67)[,2]
21     NIR = subset(col_data,wavelength==0.8)[,2]
22     NDVIhyper1 = (NIR-R1)/(NIR+R1)
23     R_data<-subset(col_data,wavelength >= 0.60 & wavelength < asd.seg$psi[3])
24     R = min(R_data[,2])
25     Rw= subset(col_data,site==R)[,1]
26     NDVlt1 = (NIR-R)/(NIR+R)
27     G_Rslope=mod1$coefficients[2]
28     G_Rslope<-as.data.frame(G_Rslope)
29     rededge_slope=mod2$coefficients[2]
30     rededge_slope<-as.data.frame(rededge_slope)
31     NIR_slope=mod3$coefficients[2]
32     NIR_slope<-as.data.frame(NIR_slope)
33     newline <- data.frame(t(c(site =
34     names(wuyispec[i]),R_seg=asd.seg$psi[3],NIR_seg=asd.seg$psi[4],G_Rslope=G_Rslope[1,1],rededge_slope=rededge_slope[1,1],NIR_slope=NIR_slope[1,1],NDVIhyper=NDVIhyper1,Rmin =Rw,NDVlt=NDVlt1)))
35     results <- rbind(results, newline)
36     print(i)
37 }
38 write.table(results, file = "results.csv", row.names = FALSE, append = FALSE, col.names =
39 FALSE, sep = ", ")

```
